# Supplementary material for: Efficiency of Coagulation/Flocculation for the Removal of Complex Mixture of Textile Fibers from Water
Source: MDPI journal article supplement (doi:10.3390/pr11030820), 2023-03-09
Supplement: s1 [file s1]

**Table S1:** Doses of coagulants used in experiments

| Matrix type           | Coagulant doses                  |                                 |                                                                                          |
|-----------------------|----------------------------------|---------------------------------|------------------------------------------------------------------------------------------|
|                       | FeCl <sub>3</sub><br>(mmol Fe/l) | PACl<br>(mmol Al/l)             | FeCl <sub>3</sub> and PACl concentrations<br>in combined coagulation<br>(mmol (Fe/Al)/l) |
| Synthetic matrix      | 0.72; 1.79; 2.51; 3.22;          | 0.77; 1.54; 2.31; 3.08;         | 1.79/1.54                                                                                |
| Surface water         | 3.94                             | 3.85                            | 1.79/2.31                                                                                |
| Laundry<br>wastewater | 7.16, 10.7, 14.3, 17.9;<br>21.5  | 1.92; 3.84; 5.76; 7.69;<br>9.61 | 14.3/3.85                                                                                |

**Table S2:** Concentration of textile fibers in synthetic water after coagulation/flocculation

| Dose of FeCl <sub>3</sub> |      |                                                        | Dose of PACl |      |                                                        | Dose of FeCl <sub>3</sub> /PACl |                 |                                                        |
|---------------------------|------|--------------------------------------------------------|--------------|------|--------------------------------------------------------|---------------------------------|-----------------|--------------------------------------------------------|
| mM                        | mg/l | Textile fibers<br>concentration<br>in water<br>(mg/l)* | mM           | mg/l | Textile fibers<br>concentration<br>in water<br>(mg/l)* | mM                              | mg/l            | Textile fibers<br>concentration<br>in water<br>(mg/l)* |
| -                         | -    | 100                                                    | -            | -    | 100                                                    | -                               | -               | 100                                                    |
| 0.72                      | 40   | 33                                                     | 0.77         | 10   | 40                                                     | 1.79/1.54<br>Fe/Al              | 100/20<br>Fe/Al | 65                                                     |
| 1.79                      | 100  | 19                                                     | 1.54         | 20   | 39                                                     | 1.54/1.79<br>Al/Fe              | 20/100<br>Al/Fe | 34                                                     |
| 2.51                      | 140  | 20                                                     | 2.31         | 30   | 12                                                     | 1.54/1.79<br>Fe+Al              | 100+20<br>Fe+Al | 22                                                     |
| 3.22                      | 180  | 24                                                     | 3.08         | 40   | 43                                                     |                                 |                 |                                                        |
| 3.94                      | 220  | 1                                                      | 3.85         | 50   | 9                                                      |                                 |                 |                                                        |

\*Average of two measurements

**Table S3:** Concentration of textile fibers in surface water after coagulation/flocculation

| Dose of FeCl <sub>3</sub> |      |                                                        | Dose of PACl |      |                                                        | Dose of FeCl <sub>3</sub> /PACl |                 |                                                        |
|---------------------------|------|--------------------------------------------------------|--------------|------|--------------------------------------------------------|---------------------------------|-----------------|--------------------------------------------------------|
| mM                        | mg/l | Textile fibers<br>concentration<br>in water<br>(mg/l)* | mM           | mg/l | Textile fibers<br>concentration<br>in water<br>(mg/l)* | mM                              | mg/l            | Textile fibers<br>concentration<br>in water<br>(mg/l)* |
| -                         | -    | 100                                                    | -            | -    | 100                                                    | -                               | -               | 100                                                    |
| 0.72                      | 40   | 1                                                      | 0.77         | 10   | 0                                                      | 1.79/2.31<br>Fe/Al              | 100/10<br>Fe/Al | 44                                                     |
| 1.79                      | 100  | N/A                                                    | 1.54         | 20   | 26                                                     | 2.31/1.79<br>Al/Fe              | 10/100<br>Al/Fe | 14                                                     |
| 2.51                      | 140  | N/A                                                    | 2.31         | 30   | 17                                                     | 2.31/1.79<br>Fe+Al              | 100+10<br>Fe+Al | 19                                                     |
| 3.22                      | 180  | N/A                                                    | 3.08         | 40   | 11                                                     |                                 |                 |                                                        |
| 3.94                      | 220  | N/A                                                    | 3.85         | 50   | 12                                                     |                                 |                 |                                                        |

\*Average of two measurements

**Table S4:** Concentration of textile fibers in laundry wastewater after coagulation/flocculation

| Dose of FeCl <sub>3</sub> |      |                                               | Dose of PACl |      |                                               | Dose of FeCl <sub>3</sub> /PaCl |                 |                                               |
|---------------------------|------|-----------------------------------------------|--------------|------|-----------------------------------------------|---------------------------------|-----------------|-----------------------------------------------|
| mM                        | mg/l | Textile fibers concentration in water (mg/l)* | mM           | mg/l | Textile fibers concentration in water (mg/l)* | mM                              | mg/l            | Textile fibers concentration in water (mg/l)* |
| -                         | -    | 100                                           | -            | -    | 100                                           | -                               | -               | 100                                           |
| 7.16                      | 400  | 35                                            | 1.92         | 25   | 9                                             | 14.3/3.85<br>Fe/Al              | 600/25<br>Fe/Al | 24                                            |
| 10.74                     | 600  | 15                                            | 3.85         | 50   | 4                                             | 3.85/14.3<br>Al/Fe              | 25/600<br>Al/Fe | 9                                             |
| 14.32                     | 800  | 8                                             | 5.77         | 75   | 5                                             | 3.85/14.3<br>Fe+Al              | 600+25<br>Fe+Al | 27                                            |
| 17.90                     | 1000 | 7                                             | 7.69         | 100  | 11                                            |                                 |                 |                                               |
| 21.49                     | 1200 | 4                                             | 9.62         | 125  | 8                                             |                                 |                 |                                               |

\*Average of two measurements
